# Supplementary material for: TIFA has dual functions in Helicobacter pylori‐induced classical and alternative NF‐κB pathways
Source: PubMed Central journal article supplement — EMBO Rep. 2021 Jul 30;22(9):e52878. doi: 10.15252/embr.202152878 (PMC8419686; doi:10.15252/embr.202152878), 2021-07-30
Supplement: EMBR-22-e52878-s001.pdf [file EMBR-22-e52878-s001.pdf]

## Expanded View Figures

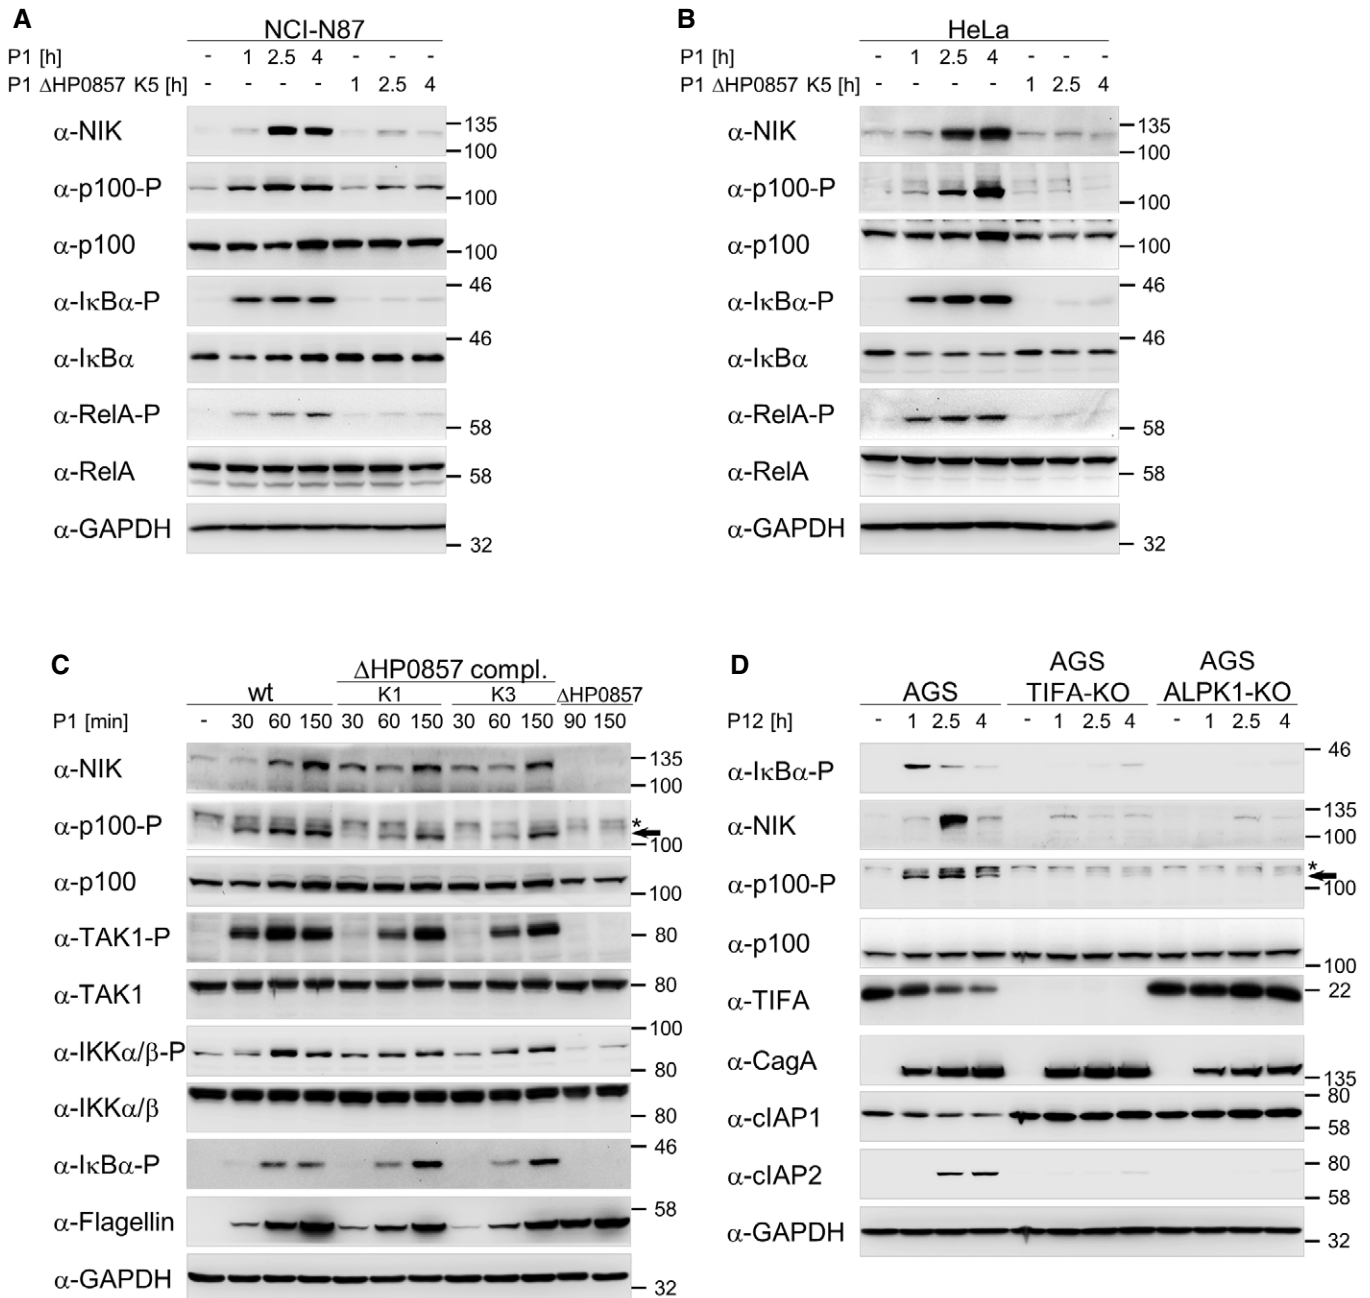

**Figure EV1. Induction of the classical and alternative NF- $\kappa$ B pathways by *H. pylori* depends on ADP-heptose.**

A, B Infection of NCI-N87 and HeLa cells with the *H. pylori* P1 wild-type or isogenic  $\Delta$ HP0857 (mutated in the *gmhA* gene) strains was performed.

C AGS cells were infected with the *H. pylori* P1 wild-type strain, isogenic strain mutated in the *gmhA* gene ( $\Delta$ HP0857) alone or complemented with P1 *gmhA* gene. Asterisk denotes an unspecific band and the arrow indicates the band corresponding to phosphorylated p100.

D Infection of AGS, TIFA-KO, and ALPK1-KO cells with the *H. pylori* P12 wild-type strain was performed. Asterisk denotes an unspecific band and the arrow indicates the band corresponding to phosphorylated p100.

Data information: Total cell lysates were analyzed by immunoblotting with the indicated antibodies. Data shown are representative for at least two independent experiments. GAPDH served as loading control.

Source data are available online for this figure.

**Figure EV2. TIFA is required for the activation of NF- $\kappa$ B upon *H. pylori* infection.**

- A The nuclear translocation of transcription factors RelA and RelB was analyzed in nuclear fractions of AGS and TIFA-KO cells. C23 served as loading control.
- B Analysis of the activation of ERK1/2, p38, and JNK in AGS and TIFA-KO cells by immunoblot. CagA demonstrated a similar infection rate of different cells.
- C–E Analysis of IL-1 $\beta$  (C), TNF (D), and LT $\alpha_1\beta_2$  (E) treatment of AGS and TIFA-KO cells by immunoblotting revealed the specificity of TIFA for *H. pylori* infection. Cell lysates were analyzed by immunoblotting with the indicated antibodies. Asterisk denotes an unspecific band and the arrow indicates the band corresponding to phosphorylated p100 (E).
- F Transfection of His-tagged recombinant TIFA into TIFA-KO cells rescued the activation of classical and alternative NF- $\kappa$ B pathways upon *H. pylori* infection. Cell lysates were analyzed by immunoblotting with the indicated antibodies.
- G AGS cells were transfected with siRNA against TRAF2 and infected with the *H. pylori* P1 wild-type strain. Cell lysates were analyzed by immunoblotting using the indicated antibodies.
- H AGS cells were transfected with siRNA against TRAF6 and infected with the *H. pylori* P1 wild-type strain. Cell lysates were analyzed by immunoblotting using the indicated antibodies.

Data information: Data shown are representative for at least two independent experiments. GAPDH served as loading control.

Source data are available online for this figure.

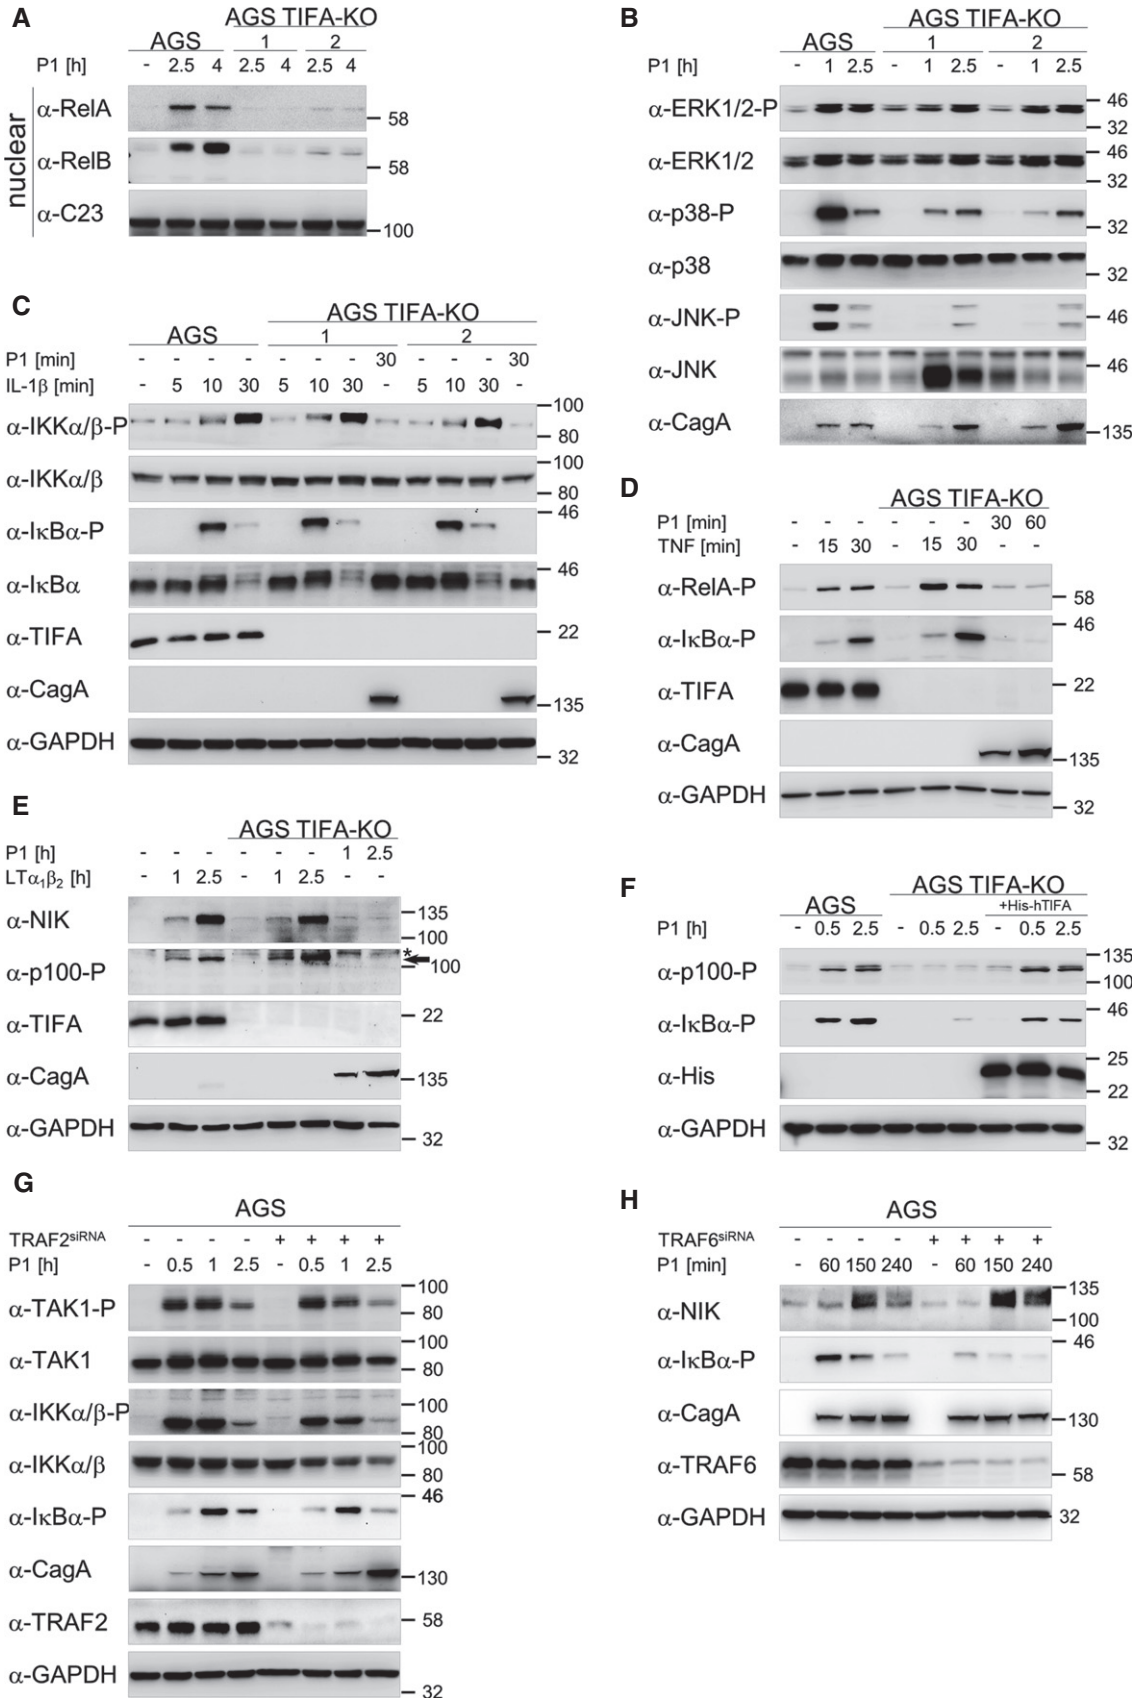

Figure EV2.

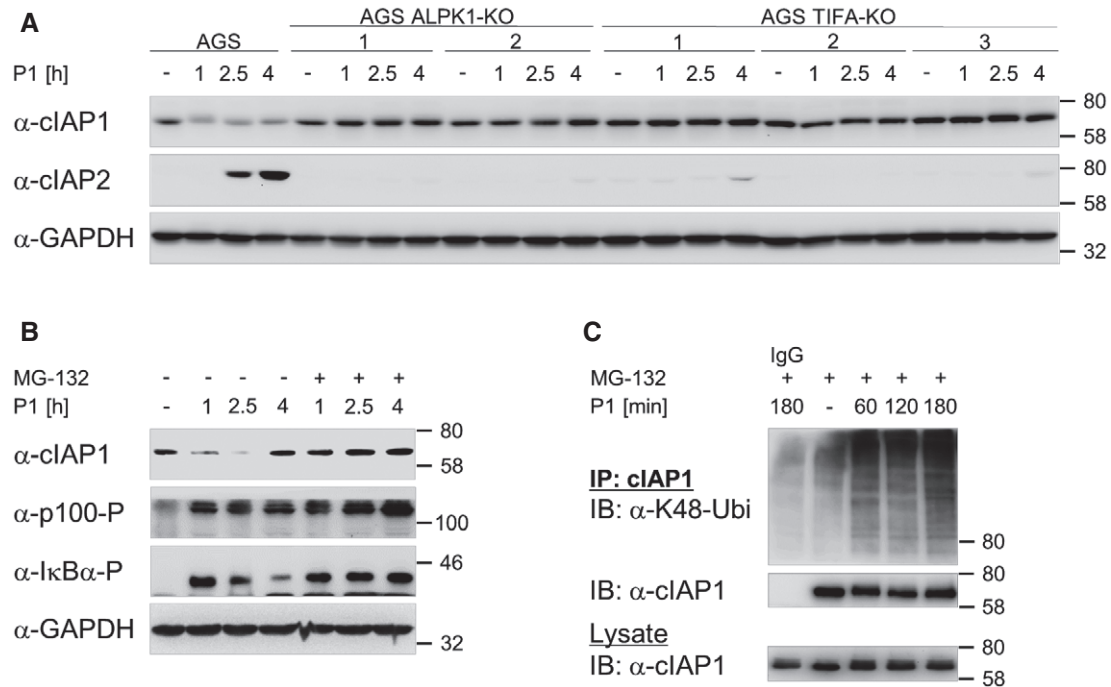

**Figure EV3. Degradation of cIAP1 and synthesis of cIAP2 upon *H. pylori* infection in AGS, ALPK1-KO, and TIFA-KO cells.**

- A AGS, ALPK1-KO, and TIFA-KO cells were infected with *H. pylori*. Total cell lysates were analyzed by immunoblotting for the expression of cIAP1 and cIAP2.
- B AGS cells were treated with 10  $\mu$ M MG-132 thirty minutes after infection with *H. pylori*. Total cell lysates were analyzed by immunoblotting for the expression of cIAP1 and phosphorylation of p100 and I $\kappa$ B $\alpha$ .
- C AGS cells were treated with 10  $\mu$ M MG-132 thirty minutes after infection with *H. pylori*. Cells were harvested in lysis buffer containing 1% SDS. Lysates were diluted 1:10 in lysis buffer without SDS and subjected to IP with antibody against cIAP1 or an isotype-matched antibody (IgG). Eluates and total cell lysates were analyzed by immunoblotting using the indicated antibodies.

Data information: Data shown are representative for at least two independent experiments. GAPDH served as loading control. Source data are available online for this figure.

**Figure EV4. Co-localization of TRAF6 with TIFAsomes formed upon *H. pylori* infection.**

- A TIFA-KO cells transiently expressing TIFA-tdTomato were left uninfected or infected with *H. pylori* for 60 min. TIFAsomes were detected by epifluorescence microscopy. Secondary antibody control with no primary antibody added was also shown. The nuclei were counterstained with DAPI. Scale bar = 10  $\mu$ m.
- B TIFA-KO cells were transiently transfected with TIFA-tdTomato and infected with *H. pylori* for 60 min, followed by immunofluorescence detection of TRAF6. Specific regions of interest (ROIs) in the micrographs were analyzed for co-localization between TRAF6 and TIFAsomes. The Fiji software with the plug-in JACoP using Costes' automatic threshold was used. Presented are the values for Pearson's coefficient ( $r$ ) and Manders's coefficient (M1&M2). Scale bar = 20  $\mu$ m (left) and 10  $\mu$ m (right).

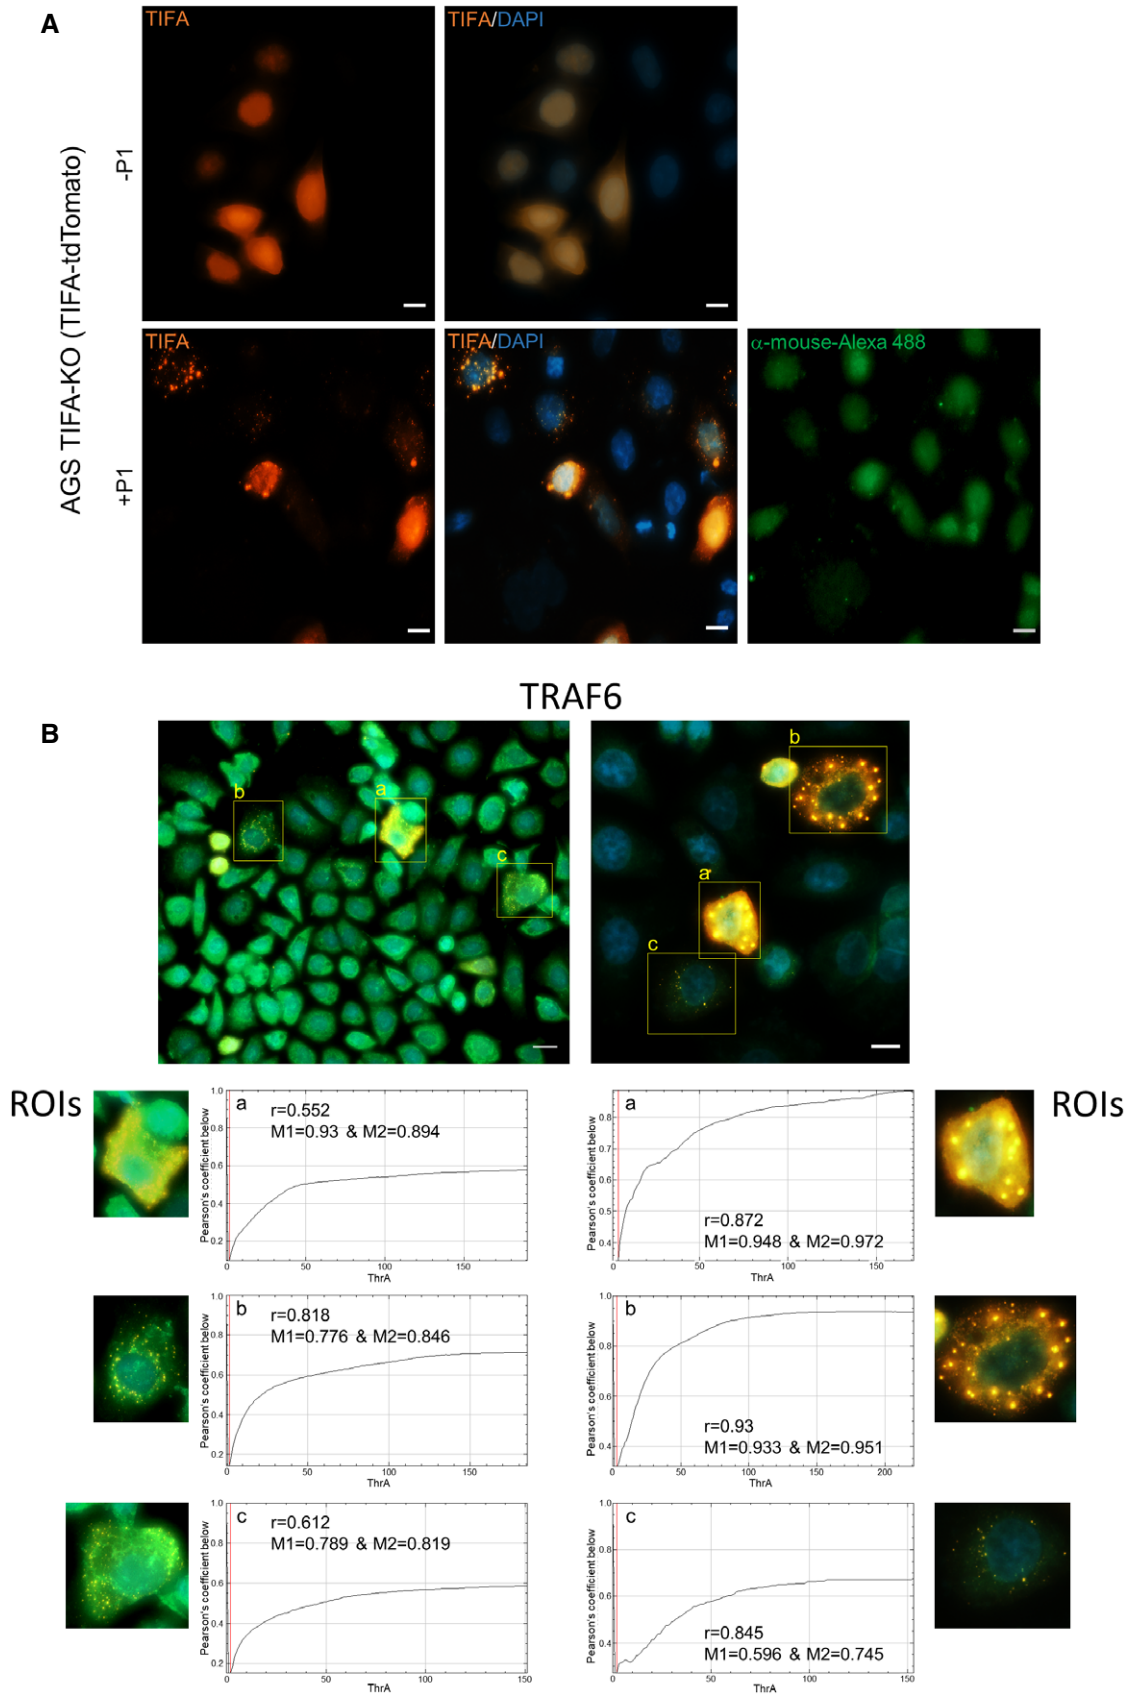

Figure EV4.

**Figure EV5. Co-localization of TRAF3, TRAF2, or cIAP1 with TIFAsomes formed upon *H. pylori* infection.**

TIFA-KO cells were transiently transfected with TIFA-tdTomato and infected with *H. pylori* for 60 min, followed by immunofluorescence detection of TRAF2, cIAP1, and TRAF3. Specific regions of interest (ROIs) in the micrographs were analyzed for co-localization of TRAF2, cIAP1, or TRAF3 with TIFAsomes. The Fiji software with the plug-in JACoP using Costes' automatic threshold was used. Presented are the values for Pearson's coefficient ( $r$ ) and Manders's coefficient (M1&M2). Scale bar = 20  $\mu\text{m}$  (TRAF2, cIAP1) and 10  $\mu\text{m}$  (TRAF3).

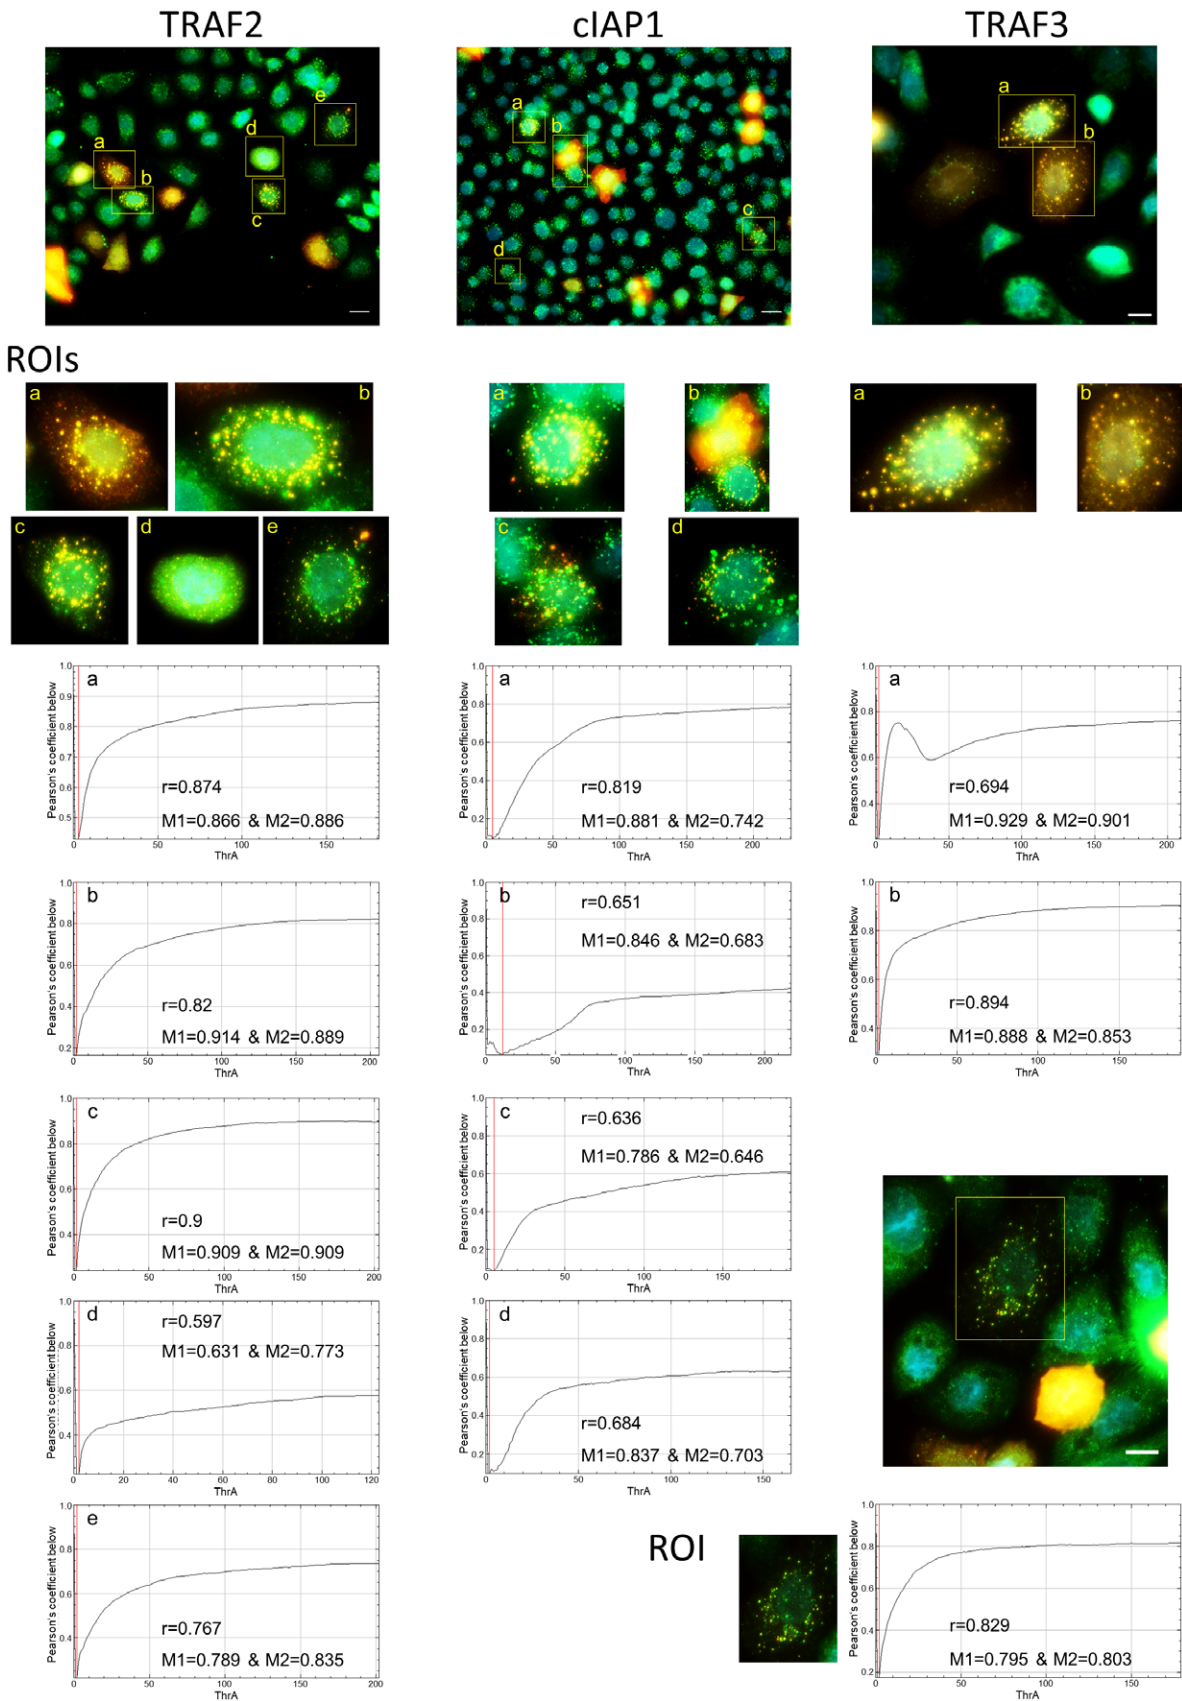

Figure EV5.
