# Supplementary material for: TIFA has dual functions in Helicobacter pylori‐induced classical and alternative NF‐κB pathways
Source: PubMed Central journal article supplement — EMBO Rep. 2021 Jul 30;22(9):e52878. doi: 10.15252/embr.202152878 (PMC8419686; doi:10.15252/embr.202152878), 2021-07-30

# Fig. 2 uncropped immunoblots

A

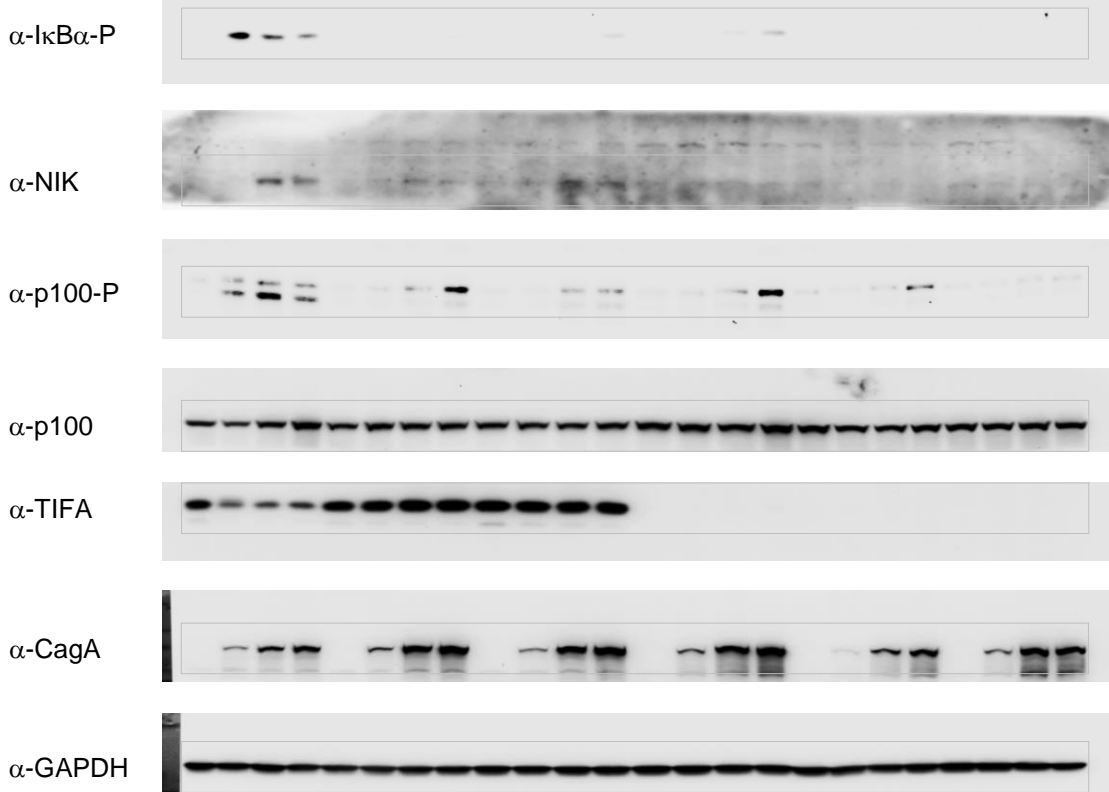

Please note that a pre-stained marker was used for blotting, which is not detected in the immunoblots. Therefore, the marker lane was copied to the first exposure of a blot after detection (taken from images of the membrane after transfer). The reason why not all strips contain the marker lane is that a different exposure was finally used for the figure, which had not the marker copied in.

C

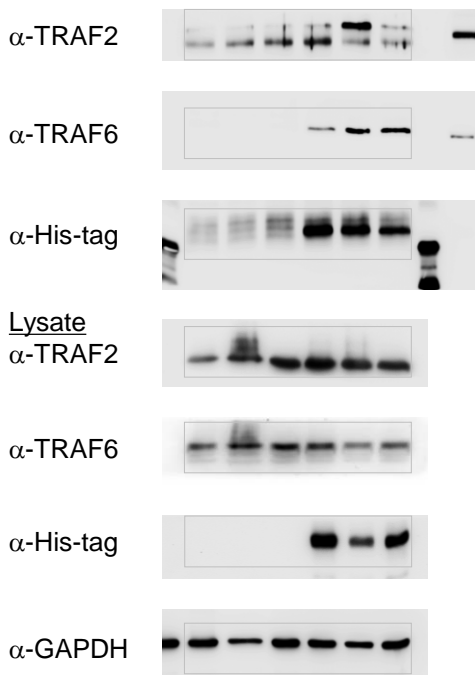

D

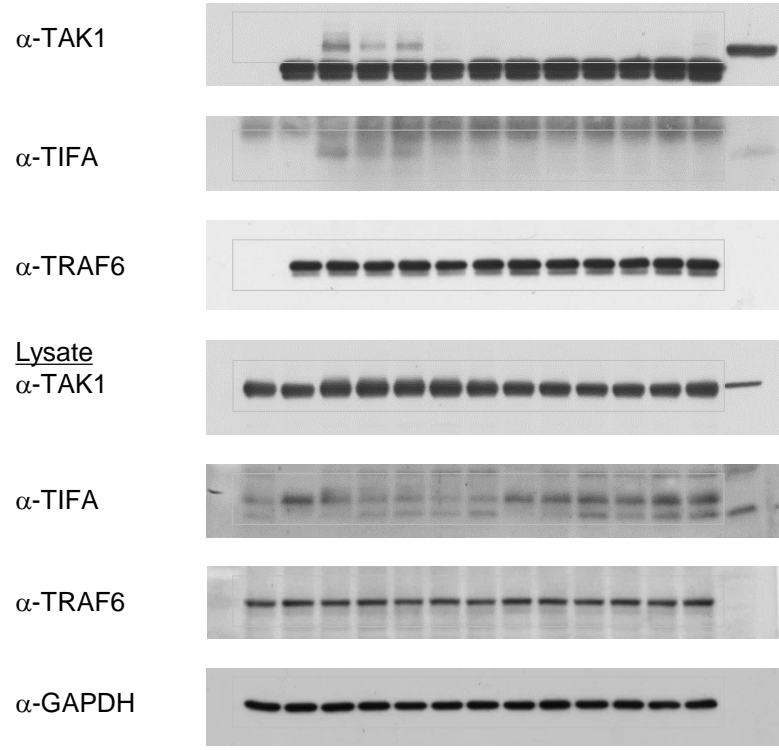

Fig. 2 uncropped immunoblots

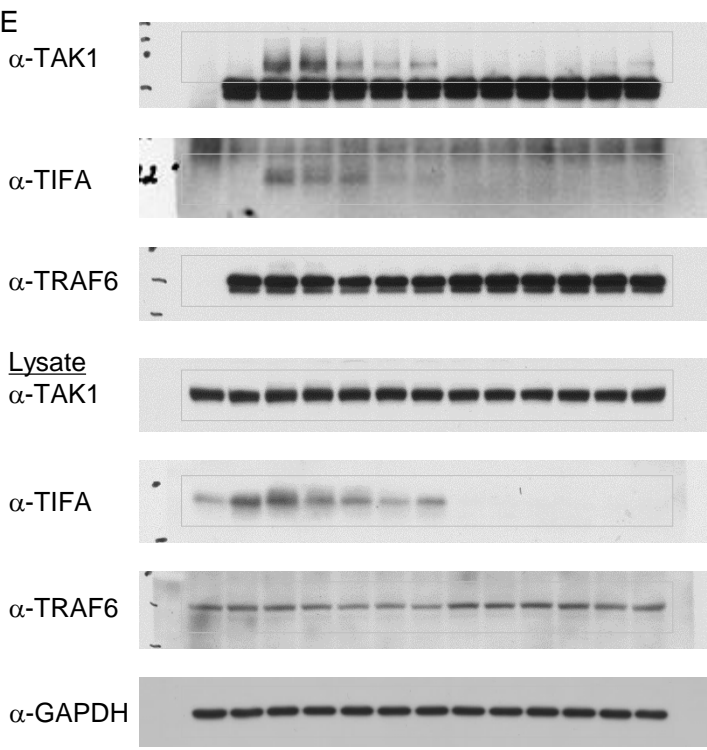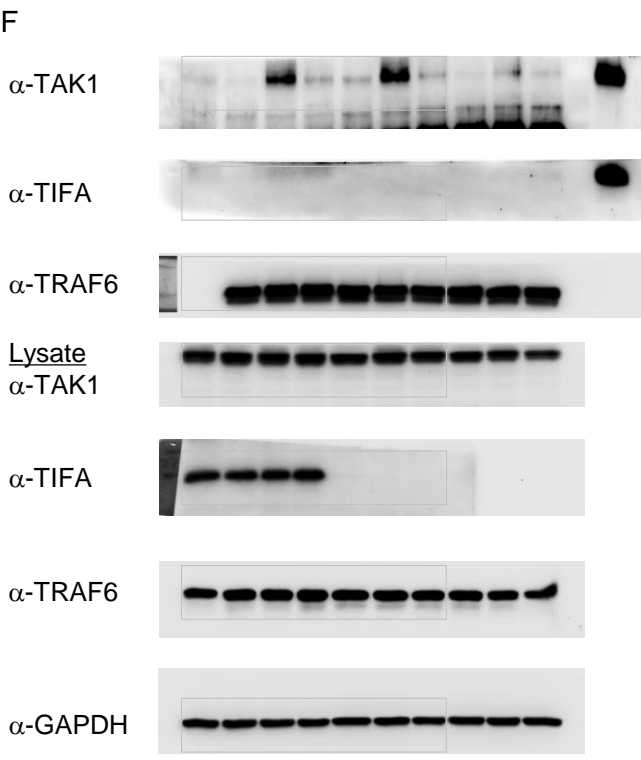

Supplement: EMBR-22-e52878-s002.pdf [file EMBR-22-e52878-s002.pdf]
